# Supplementary material for: The influence of branched alkyl side chains in A–D–A oligothiophenes on the photovoltaic performance and morphology of solution-processed bulk-heterojunction solar cells
Source: Royal Society of Chemistry journal article supplement (doi:10.1039/c7qo00222j), 2017-01-01
Supplement: c7qo00222j1.pdf [file c7qo00222j1.pdf]

## Supporting Information

### The Influence of Branched Alkyl Side Chains in A-D-A Oligothiophenes on the Photovoltaic Performance and Morphology of Solution-processed Bulk-heterojunction Solar Cells

*Ibrahim Ata,<sup>a</sup> Sadok Ben Dkhil,<sup>b</sup> Martin Pfannmöller,<sup>c</sup> Sara Bals,<sup>d</sup> David Duché,<sup>e</sup> Jean-Jacques Simon,<sup>e</sup> Tomoyuki Koganezawa,<sup>f</sup> Noriyuki Yoshimoto,<sup>g</sup> Christine Videlot-Ackermann,<sup>b</sup> Olivier Margeat,<sup>b</sup> Jörg Ackermann,<sup>b\*</sup> Peter Bäuerle<sup>a\*</sup>*

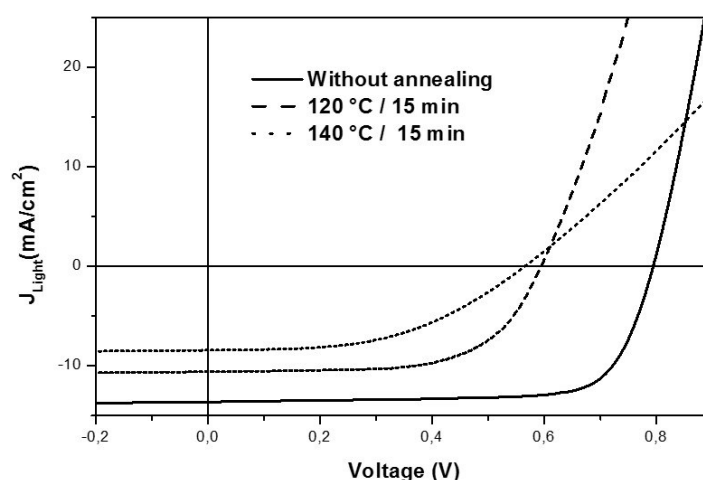

**Figure S1:** J-V curves of optimized solar cells using oligomer 2 as donor that were exposed individually to a single post-annealing step during 15 min with temperatures of 120°C and 140°C, respectively

**Table S1:** Photovoltaic parameters of optimized solar cells using oligomer 2 as donor that were exposed individually to a single post-annealing step f 15 min with temperatures of 120°C and 140°C, respectively.

|                   | $J_{sc}$<br>[mA/cm <sup>2</sup> ] | $V_{oc}$<br>[V] | FF<br>[%] | PCE<br>[%] |
|-------------------|-----------------------------------|-----------------|-----------|------------|
| Without annealing | 13.62                             | 0.79            | 75        | 8.16       |
| 120 °C/15 min     | 10.58                             | 0.59            | 64        | 4.02       |
| 140 °C/15 min     | 8.42                              | 0.57            | 49        | 2.33       |

**Table S2:** Thin film transistor data of spin-coated oligomers **1** and **2** based thin films from chloroform solutions at 8 mg/mL.

|          |          | $\mu$ (cm <sup>2</sup> .V <sup>-1</sup> .s <sup>-1</sup> ) | V <sub>t</sub> (V) |
|----------|----------|------------------------------------------------------------|--------------------|
| <b>1</b> | w/o SVA  | 4.5-6.3×10 <sup>-4</sup>                                   | 2.2-3.5            |
|          | with SVA | 0.54-1.8×10 <sup>-3</sup>                                  | 1.1-4              |
| <b>2</b> | w/o SVA  | 5.7-6.4×10 <sup>-5</sup>                                   | 8-8.5              |
|          | with SVA | 0.42-1.15×10 <sup>-4</sup>                                 | 1.8-6              |

(solutions: one night at 60°C and cooling down before spin coating at 2000 rpm for 1min)

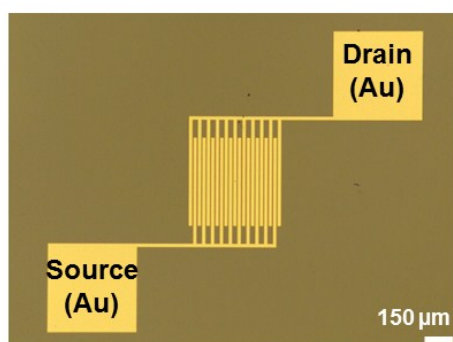

**Figure S2:** Optical microscopy image of interdigital structures used for transistor application (with L = 20 μm, W = 1 cm, C = 14.6 10<sup>-9</sup> F/cm<sup>2</sup>).

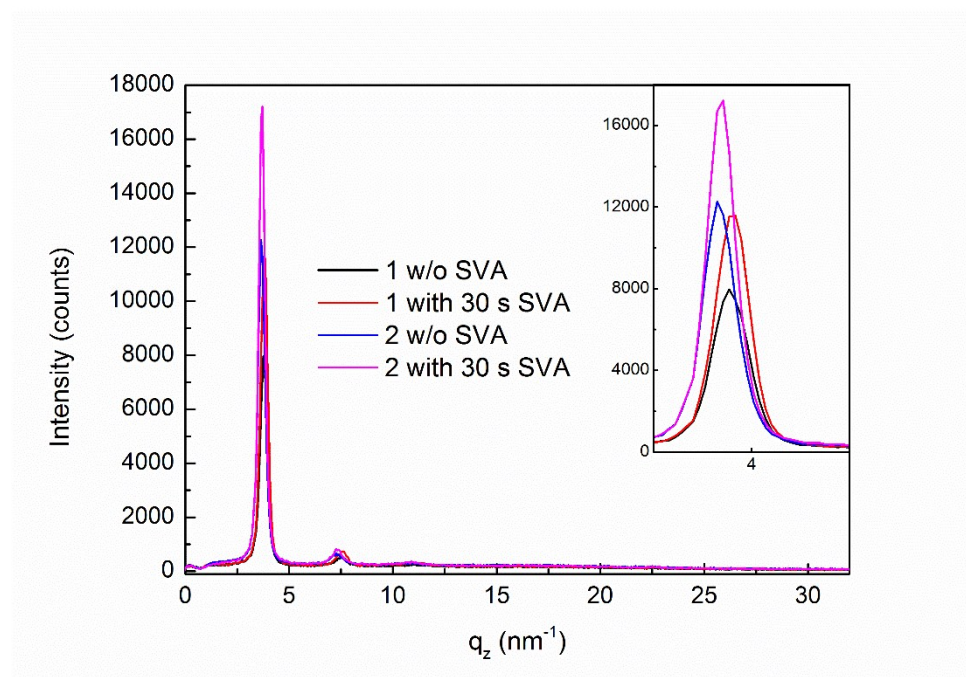

**Figure S3.** Profiles along the (100) peak before and after the 30 s SVA treatment of pure oligomer **1** and **2** layers.

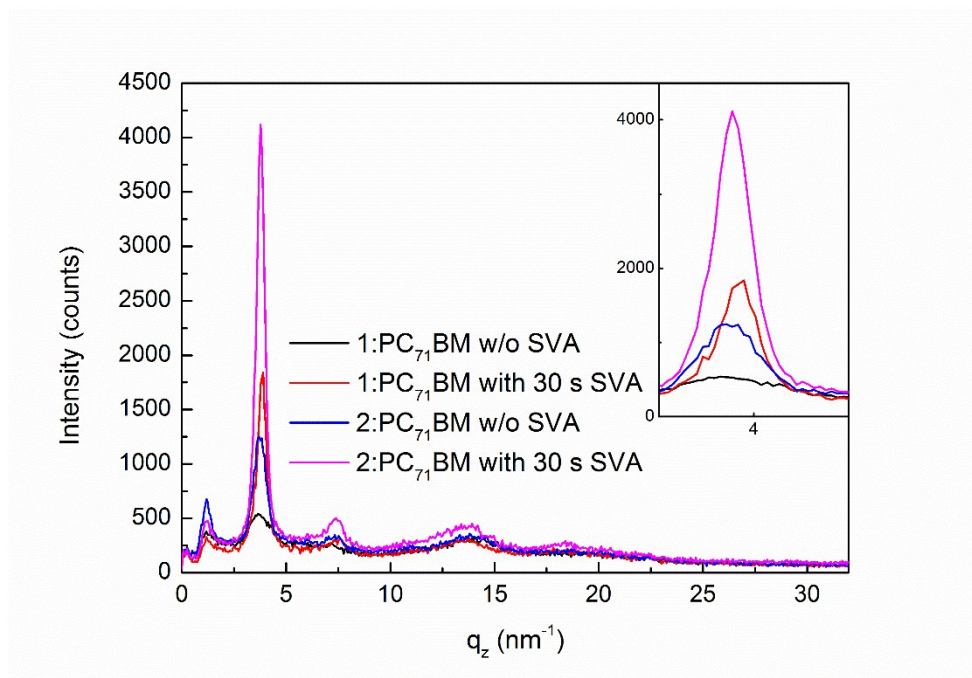

**Figure S4.** Profiles along the (100) peak before and after the 30 s SVA treatment of 1:PC<sub>71</sub>BM and 2:PC<sub>71</sub>BM blend layers.

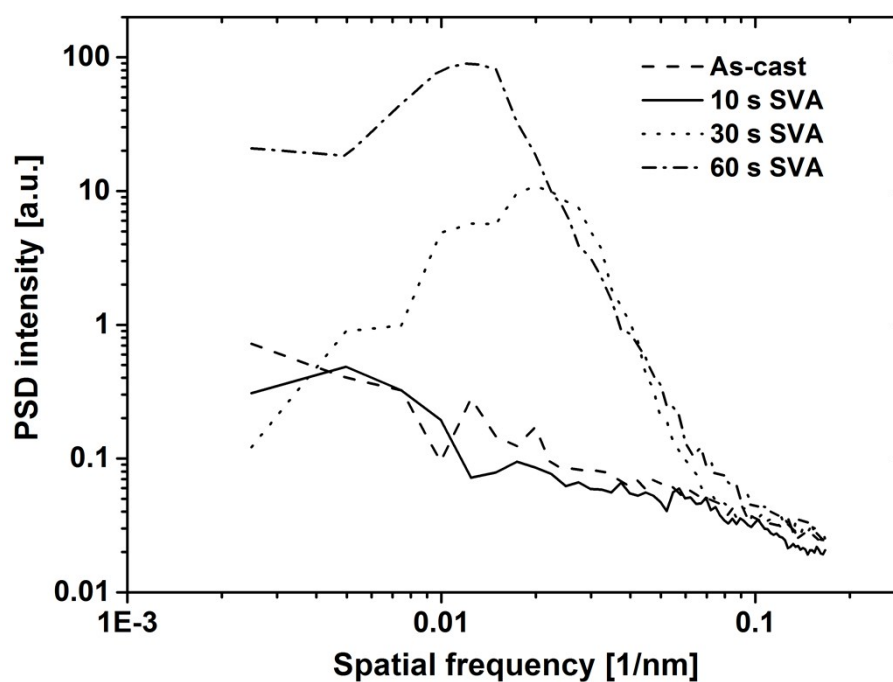

**Figure S5.** Calculated PSDs for laterally resolved plasmon-peak maps of blends after different SVA times. Larger signal indicates increased occurrence of specific domain sizes.
